# Supplementary material for: Exploring the nature of the fergusonite–scheelite phase transition and ionic conductivity enhancement by Mo6+doping in LaNbO4
Source: Royal Society of Chemistry journal article supplement (doi:10.1039/d0ta07453e), 2021-01-01
Supplement: d0ta07453e1.pdf [file d0ta07453e1.pdf]

## Exploring the nature of the fergusonite–scheelite phase transition and ionic conductivity enhancement by Mo<sup>6+</sup> doping in LaNbO<sub>4</sub>

Josie E. Auckett, Laura Lopez-Odriozola, Stewart J. Clark and Ivana R. Evans

### Supporting Information

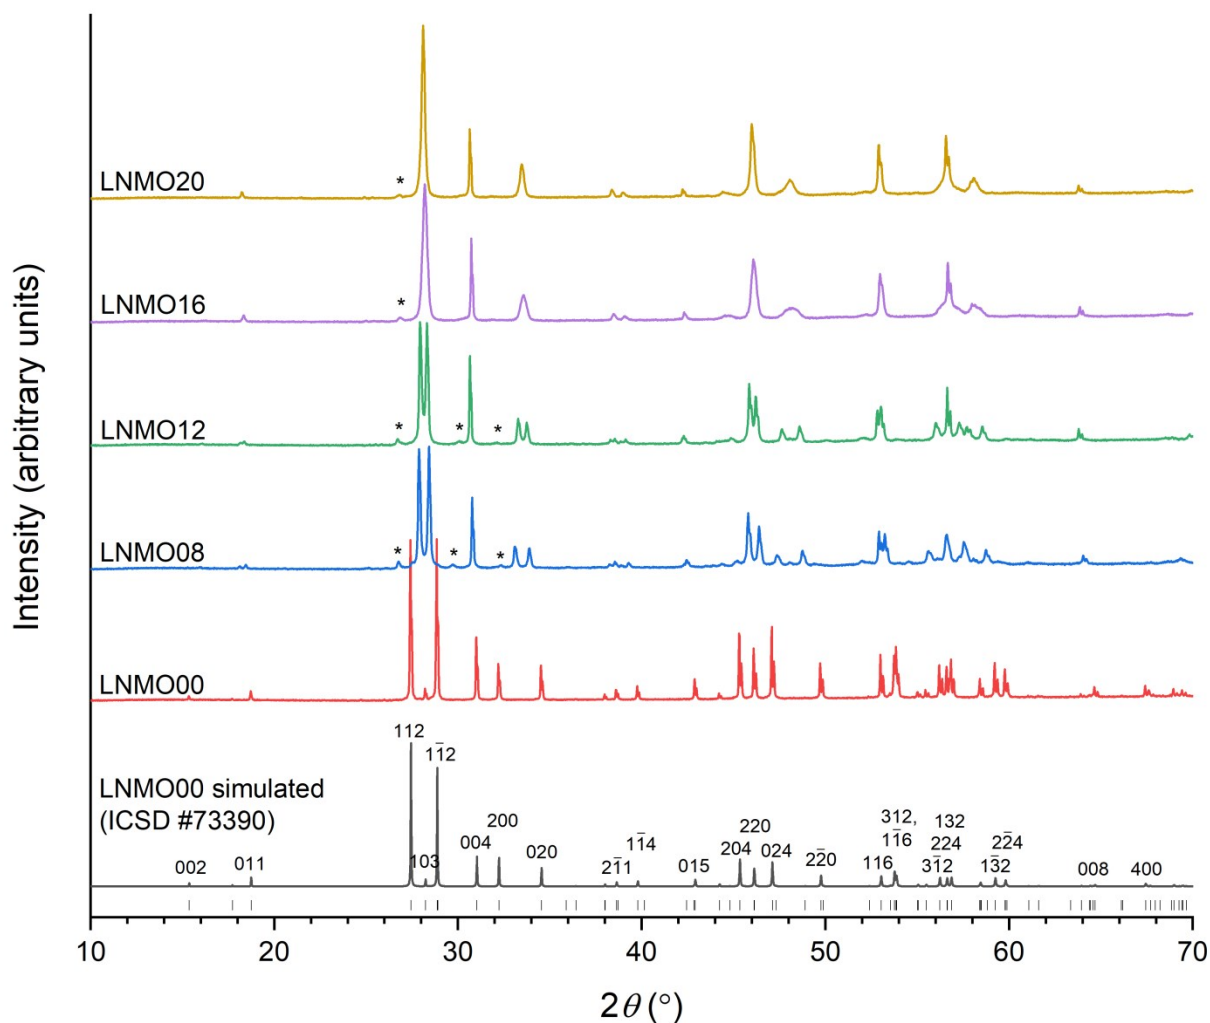

Figure S1. Powder x-ray diffraction profiles of as-made samples of LaNb<sub>1-x</sub>Mo<sub>x</sub>O<sub>4+0.5x</sub> (LNMO). Indices marked above the simulated pattern correspond to a unit cell obtained by transforming the ICSD reference structure into a setting with *I*2/*b* symmetry (*c* > *a* > *b*; *γ* < 90°) for better comparability with the tetragonal scheelite structure. Asterisks denote reflections that are considered to arise from structure modulations, by analogy to LaNb<sub>1-x</sub>W<sub>x</sub>O<sub>4+0.5x</sub>.<sup>1</sup>

| Sample | Range division (°C) | $\alpha_V$ , low $T$ range ( $\times 10^{-6} \text{ K}^{-1}$ ) | $\alpha_V$ , high $T$ range ( $\times 10^{-6} \text{ K}^{-1}$ ) |
|--------|---------------------|----------------------------------------------------------------|-----------------------------------------------------------------|
| LNMO00 | 500                 | 16.4                                                           | 9.3                                                             |
| LNMO08 | 600                 | 11.8                                                           | 11.7                                                            |
| LNMO12 | 650                 | 11.9                                                           | 15.5                                                            |
| LNMO16 | 600                 | 11.0                                                           | 14.1                                                            |
| LNMO20 | 450                 | 10.4                                                           | 13.4                                                            |

Table S1. Average linear thermal expansion coefficients derived from linear fitting to the refined lattice volumes (manuscript Figure 1(d)) above and below a range division point chosen arbitrarily to maximise the goodness of fit in each region.

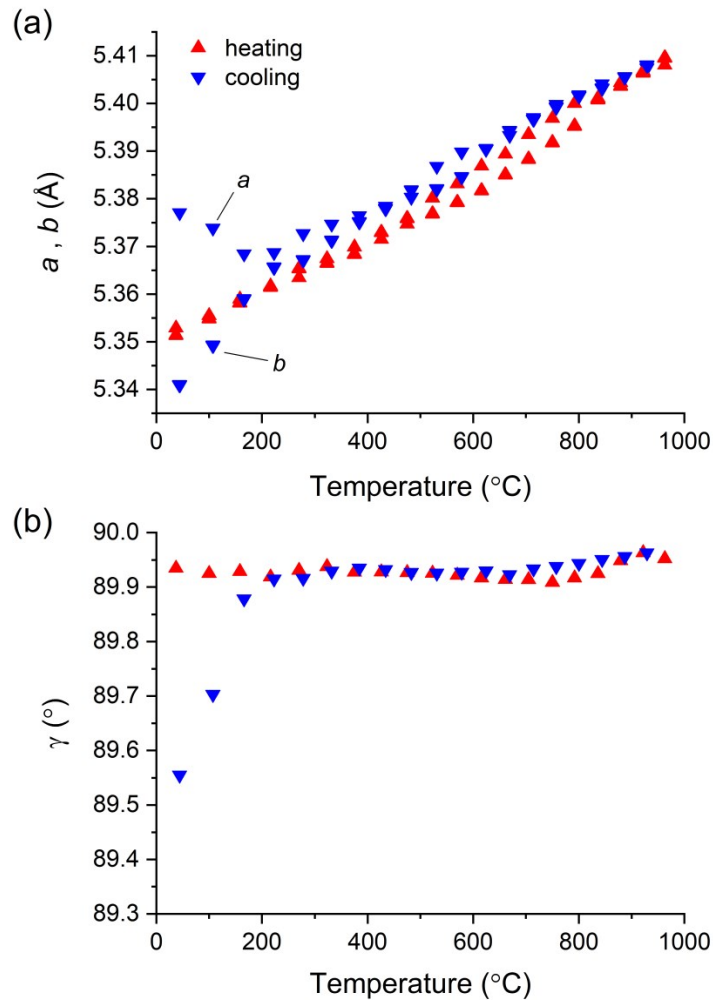

Figure S2. Comparison of lattice parameters of LNMO20 refined against VT-XRD data recorded upon heating and cooling. Error bars are smaller than the symbols.

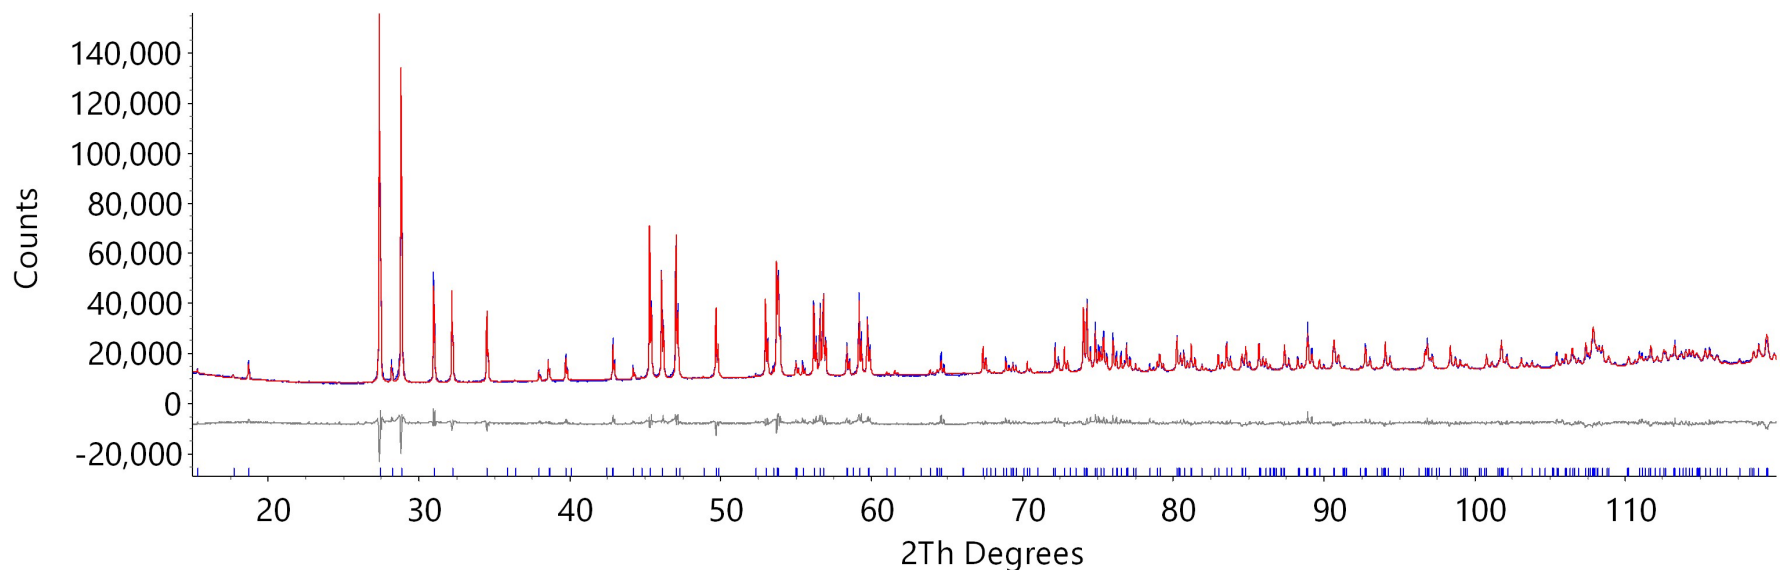

Figure S3. Laboratory x-ray diffraction data (Cu K $\alpha$  radiation) recorded for LaNbO<sub>4</sub> at room temperature (blue line), and the fit obtained by symmetry distortion mode Rietveld refinement (red line) while refining the amplitudes of eight symmetry-adapted distortion modes. (Grey line: difference between observed and calculated plots; blue markers: positions of Bragg reflections.  $R_{wp} = 3.66\%$ ,  $R_{Bragg} = 2.80\%$ )

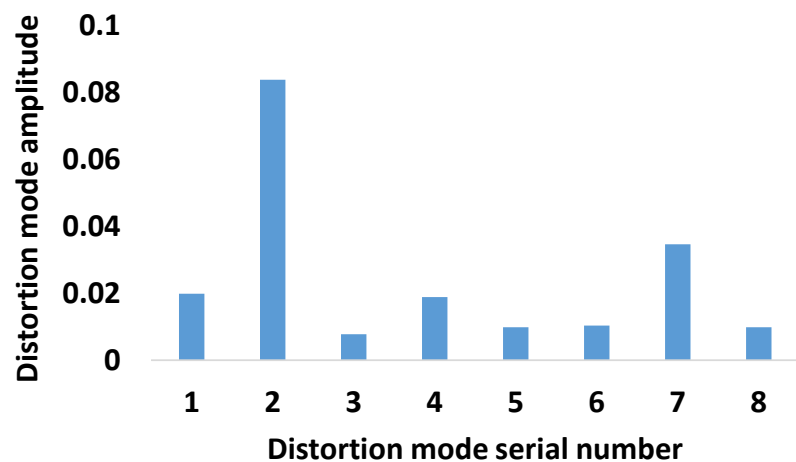

Figure S4. Amplitudes of the eight distortion modes refined in the distortion mode analysis depicted in Figure S3.

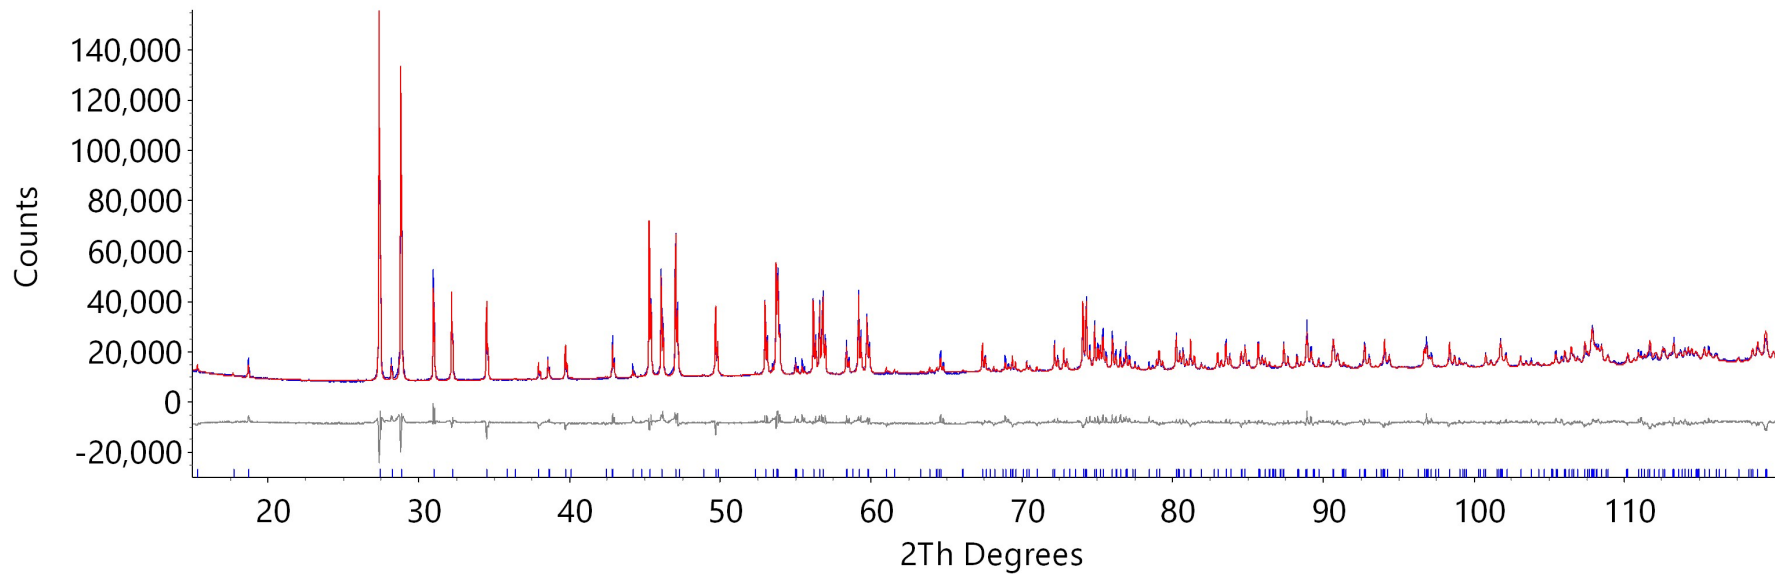

Figure S5. Symmetry distortion mode Rietveld refinement fit to the same data shown in Figure S3, while refining only the amplitude of the most significant symmetry-adapted distortion mode (a2) out of eight possible modes. (Blue line: observed; red line: calculated; grey line: difference between observed and calculated; blue markers: positions of Bragg reflections.  $R_{wp} = 4.20\%$ ,  $R_{Bragg} = 3.28\%$ )

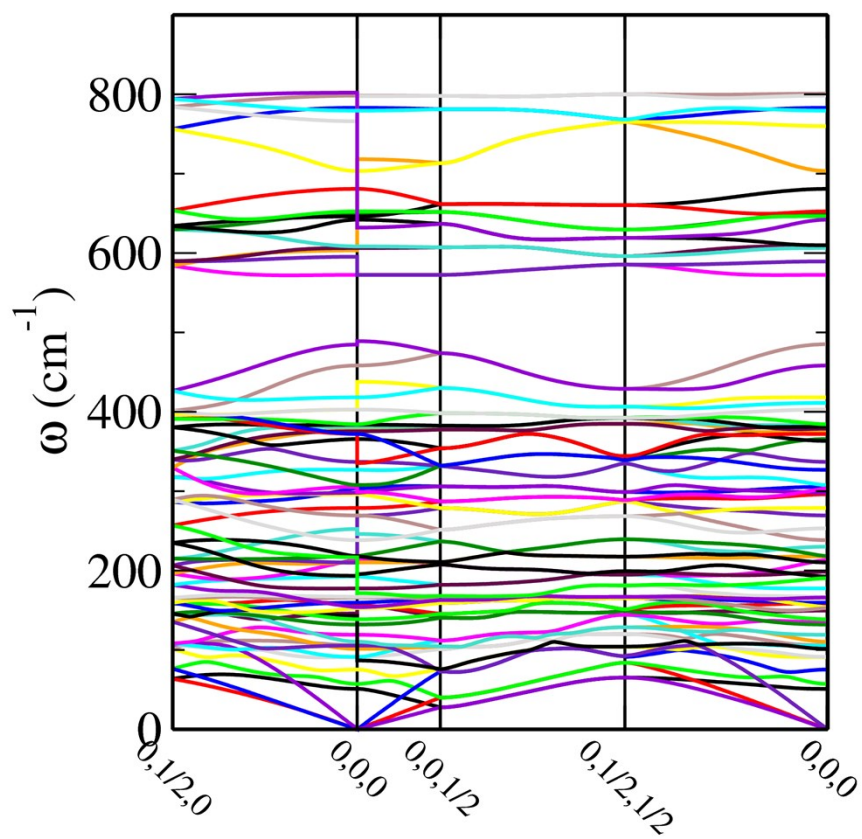

Figure S6. Phonon dispersion curves calculated for fergusonite-type  $\text{LaNbO}_4$  at  $37^\circ\text{C}$ .

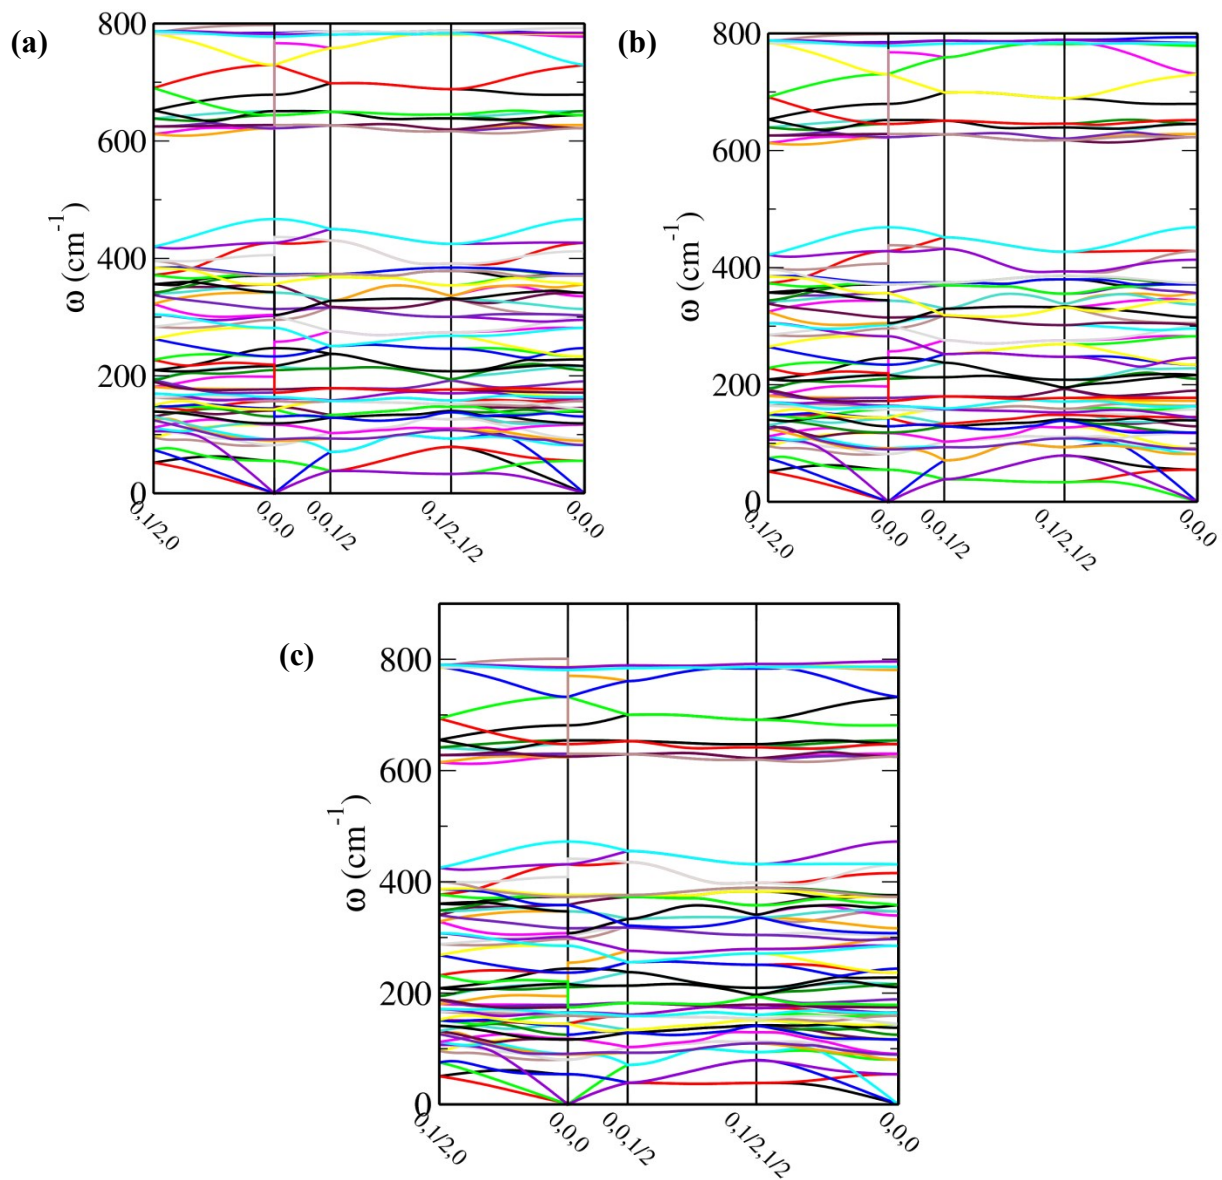

Figure S7. Phonon dispersion curves calculated for scheelite-type  $\text{LaNbO}_4$  at (a) 477 °C, (b) 377 °C and (c) 177 °C. Line colours are assigned independently for each plot and do not necessarily represent corresponding phonon modes in different plots.

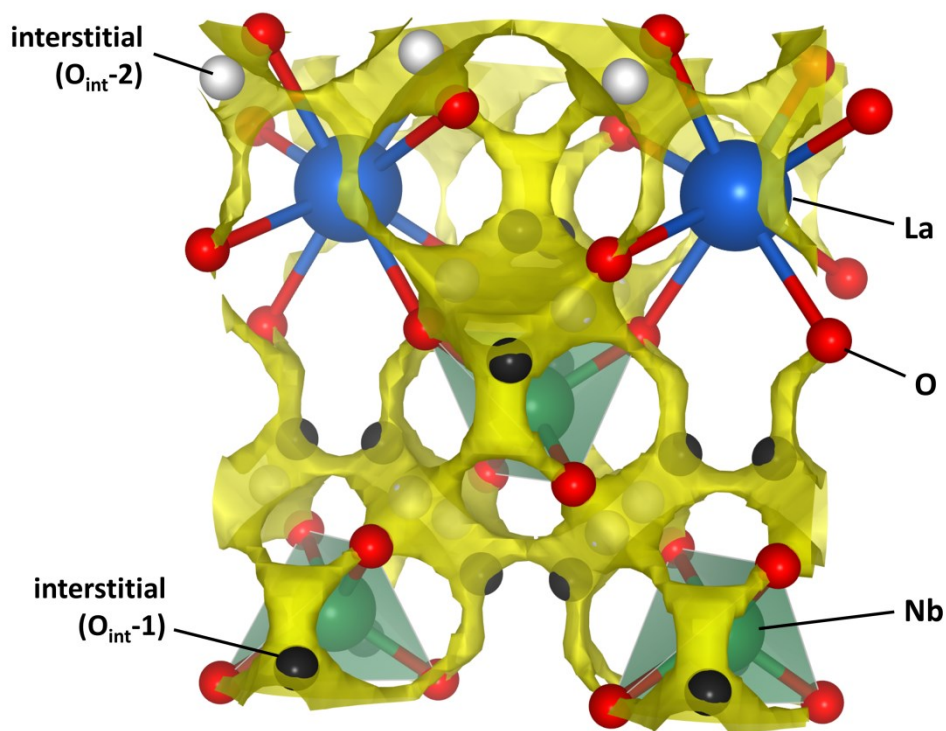

Figure S8. Section of a bond valence energy landscape (BVEL) map calculated for a DFT-optimised  $2 \times 2 \times 1$  supercell of undoped LaNbO<sub>4</sub> using 3DBVSMAPPER.<sup>2</sup> Black and white atoms mark the positions of O<sup>2-</sup> interstitial sites denoted by Toyoura *et al.*<sup>3</sup> as O<sub>int-1</sub> and O<sub>int-2</sub>, respectively (these sites are drawn for indication only and were not included in the BVEL calculation). The BVEL map is drawn at an isolevel of +0.90 eV above the minimum energy value in the interconnected pathway. (Figure prepared using VESTA<sup>4</sup>)

| <b>LNMO16</b>  |       |      |       |              |               |
|----------------|-------|------|-------|--------------|---------------|
| Observation    | Nb    | Mo   | La    | Mo/(Mo+Nb)   | (Mo+Nb)/total |
| Centre #1      | 10.86 | 2.19 | 13.19 | 0.168        | 0.497         |
| Centre #2      | 11.19 | 2.19 | 13.61 | 0.164        | 0.496         |
| Centre #3      | 11.19 | 2.21 | 13.71 | 0.165        | 0.494         |
| Centre #4      | 10.72 | 2.20 | 12.84 | 0.170        | 0.502         |
| Centre #5      | 10.77 | 2.03 | 12.90 | 0.159        | 0.498         |
| Centre #6      | 10.81 | 1.98 | 13.36 | 0.155        | 0.489         |
| <b>Average</b> |       |      |       | <b>0.163</b> | <b>0.496</b>  |
| Standard Dev.  |       |      |       | 0.005        | 0.004         |
| Edge #1        | 12.26 | 2.43 | 14.59 | 0.165        | 0.502         |
| Edge #2        | 11.12 | 2.23 | 13.70 | 0.167        | 0.494         |
| Edge #3        | 12.19 | 2.38 | 14.88 | 0.163        | 0.495         |
| Edge #4        | 11.53 | 2.44 | 14.17 | 0.175        | 0.496         |
| <b>Average</b> |       |      |       | <b>0.168</b> | <b>0.497</b>  |
| Standard Dev.  |       |      |       | 0.004        | 0.003         |
| Expected value |       |      |       | <b>0.16</b>  | <b>0.50</b>   |
| <b>LNMO20</b>  |       |      |       |              |               |
| Observation    | Nb    | Mo   | La    | Mo/(Mo+Nb)   | (Mo+Nb)/total |
| Centre #1      | 11.54 | 2.93 | 15.21 | 0.202        | 0.488         |
| Centre #2      | 11.94 | 2.98 | 15.52 | 0.200        | 0.490         |
| Centre #3      | 12.03 | 3.15 | 15.54 | 0.208        | 0.494         |
| Centre #4      | 11.57 | 2.86 | 15.23 | 0.198        | 0.487         |
| <b>Average</b> |       |      |       | <b>0.202</b> | <b>0.490</b>  |
| Standard Dev.  |       |      |       | 0.004        | 0.003         |
| Edge #1        | 12.12 | 3.06 | 14.99 | 0.202        | 0.503         |
| Edge #2        | 12.02 | 2.81 | 15.45 | 0.189        | 0.490         |
| Edge #3        | 11.75 | 2.78 | 15.03 | 0.191        | 0.492         |
| Edge #4        | 11.88 | 3.03 | 15.05 | 0.203        | 0.498         |
| <b>Average</b> |       |      |       | <b>0.196</b> | <b>0.496</b>  |
| Standard Dev.  |       |      |       | 0.005        | 0.006         |
| Expected value |       |      |       | <b>0.20</b>  | <b>0.50</b>   |

Table S2. Non-normalised relative cation abundances obtained from EDX spectra collected at various points on the surfaces of sintered pellets of LNMO16 and LNMO20. For each sample, measurement points were chosen at random and divided arbitrarily into “Centre” and “Edge” subsets based on their proximity to the pellet edge.

#### References

- 1 C. Li, R. D. Bayliss and S. J. Skinner, *Solid State Ionics*, 2014, **262**, 530-535.
- 2 M. Sale and M. Avdeev, *J. Appl. Crystallogr.*, 2012, **45**, 1054-1056.
- 3 K. Toyoura, Y. Sakakibara, T. Yokoi, A. Nakamura and K. Matsunaga, *J. Mater. Chem. A*, 2018, **6**, 12004-12011.
- 4 K. Momma and F. Izuma, *J. Appl. Crystallogr.*, 2008, **41**, 653-658.
